# Supplementary material for: Tracking the light-induced isomerization processes and the photostability of spiropyrans embedded in the pores of crystalline nanoporous MOFs via IR spectroscopy
Source: Royal Society of Chemistry journal article supplement (doi:10.1039/d0pp00267d), 2020-09-23
Supplement: d0pp00267d1.pdf [file d0pp00267d1.pdf]

## Supporting Information

Heidi A. Schwartz<sup>a,c,\*</sup>, Dominik Schaniel<sup>b</sup>, and Uwe Ruschewitz<sup>a</sup>

<sup>a</sup> *Institute of General, Inorganic and Theoretical Chemistry, University of Innsbruck, Innrain 80-82, A-6020 Innsbruck,*

*Email: heidi.schwartz@uibk.ac.at*

<sup>b</sup> *Université de Lorraine, CNRS, CRM<sup>2</sup>, F-54000 Nancy, France.*

*E-mail: dominik.schaniel@univ-lorraine.fr*

<sup>c</sup> *Department of Chemistry, University of Cologne, Greinstraße 6, D-50939 Cologne, Germany.*

*E-mail: uwe.ruschewitz@uni-koeln.de*

### Content

**Figure S1 and S2.** Difference IR spectra of SP-Nitro@MIL-68(In) and SP-Nitro@MIL-68(Ga) focusing on the irradiation time with MC IR bands with maximum intensity.

**Figure S3 and S4.** Difference IR spectra of SP-Nitro@MIL-68(In) and SP-Nitro@MIL-68(Ga) exceeding the irradiation time with MC IR bands with maximum intensity.

**Figure S5 and S6.** Difference IR spectra of SP-Nitro@MIL-68(In) and SP-Nitro@MIL-68(Ga) focusing on increasing and decreasing IR bands after long time irradiation with UV light.

**Figure S7 to S10** IR spectra of SP-Nitro@MIL-68(In) and SP-Nitro@MIL-68(Ga) after prolonged UV light irradiation, followed by a) photochemical and b) thermal treatment to induce the re-conversion to the initial state.

**Table S1 to S4.** Assignment of decreasing and increasing IR bands of SP-Nitro@MIL-68(In) and SP-Nitro@MIL-68(Ga).

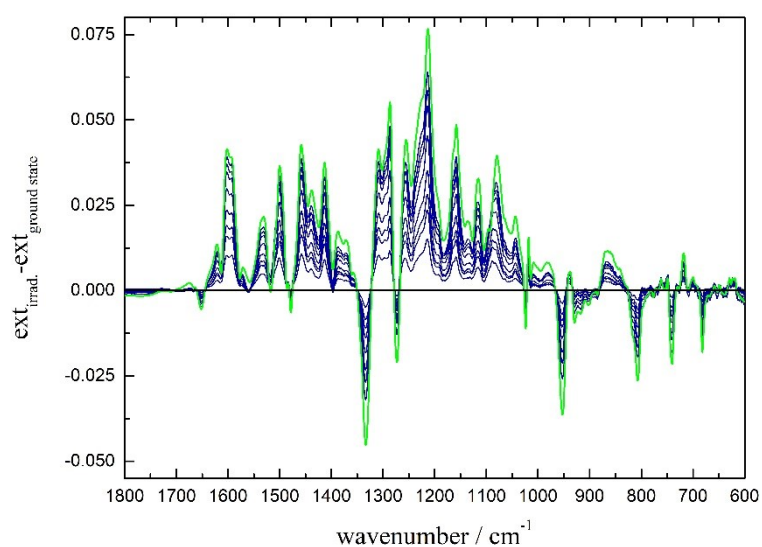

**Figure S1.** Difference IR spectra of SP-Nitro@MIL-68(In) under irradiation with UV light ( $\lambda = 365$  nm). The green line shows the spectrum, for which the maximum intensity of MC bands was observed (60 min irradiation time).

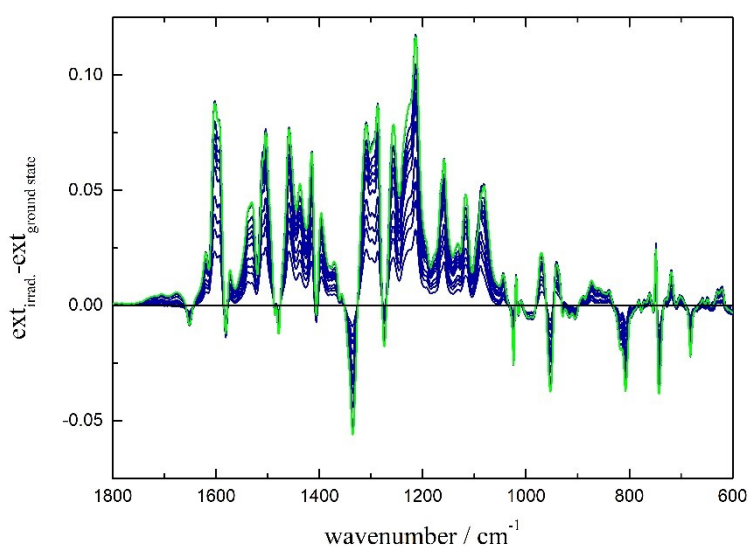

**Figure S2.** Difference IR spectra of SP-Nitro@MIL-68(Ga) under irradiation with UV light ( $\lambda = 365$  nm). The green line shows the spectrum, for which the maximum intensity of MC bands was observed (90 min irradiation time).

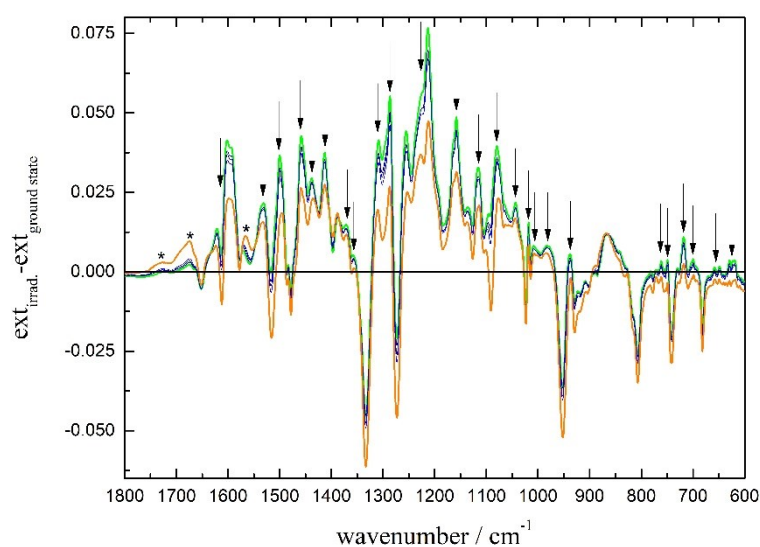

**Figure S3.** Difference IR spectra of SP-Nitro@MIL-68(In) under irradiation with UV light ( $\lambda = 365$  nm) for 60 min to 1000 min. The green line shows the spectrum, for which the maximum intensity of MC bands was observed (60 min irradiation time), the orange line corresponds to an irradiation time of 1000 min. Decreasing MC bands are marked with an arrow, whereas new increasing IR bands are labeled with an asterisk.

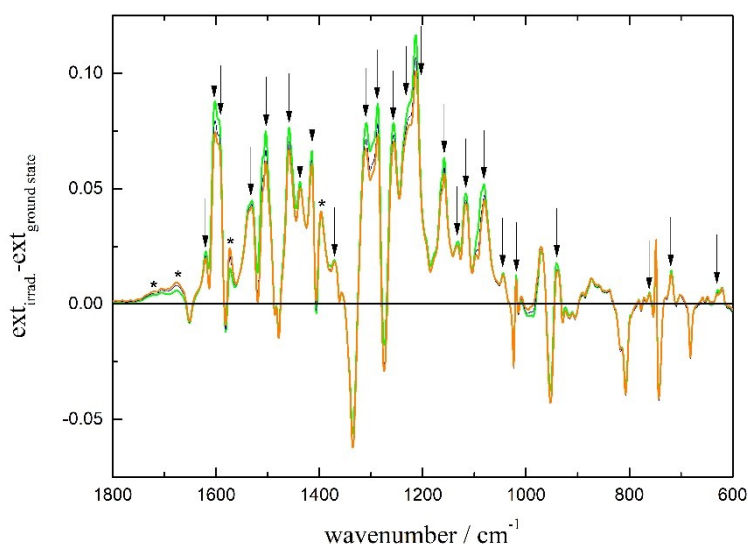

**Figure S4.** Difference IR spectra of SP-Nitro@MIL-68(Ga) under irradiation with UV light ( $\lambda = 365$  nm) for 90 min to 210 min. The green line shows the spectrum, for which the maximum intensity of MC bands was observed (90 min irradiation time), the orange line corresponds to an irradiation time of 210 min. Decreasing MC bands are marked with an arrow, whereas new increasing IR bands are labeled with an asterisk.

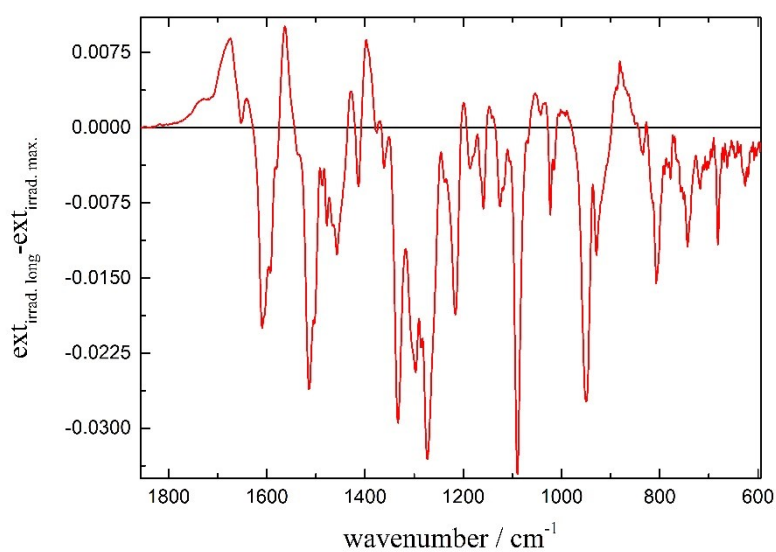

**Figure S5.** Difference IR spectrum of SP-Nitro@MIL-68(In) after irradiation with UV light (365 nm, 1000 min) after subtracting the difference spectrum obtained after 60 min UV light exposure.

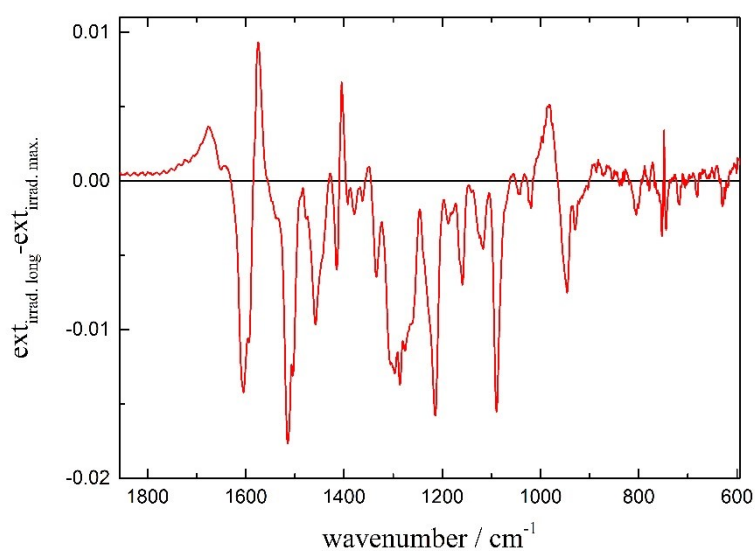

**Figure S6.** Difference IR spectrum of SP-Nitro@MIL-68(Ga) after irradiation with UV light (365 nm, 210 min) after subtracting the difference spectrum obtained after 90 min UV light exposure.

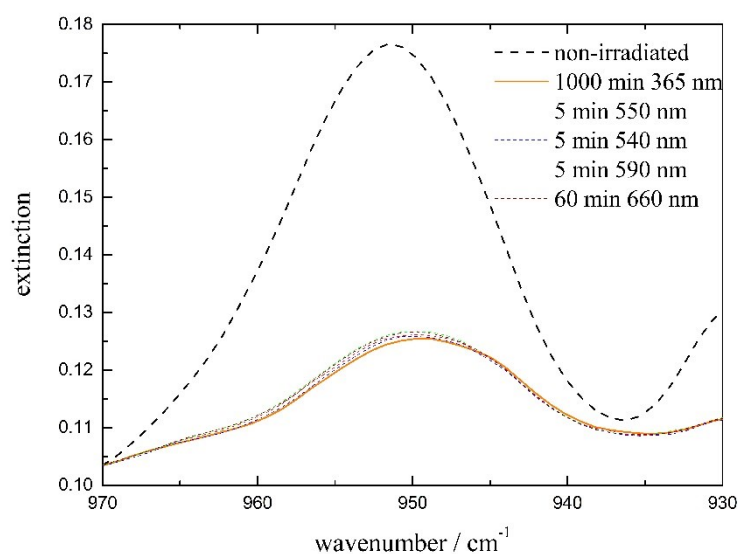

**Figure S7.** Light excitation of SP-Nitro@MIL-68(In) with different wavelengths to induce re-conversion to the ground state.

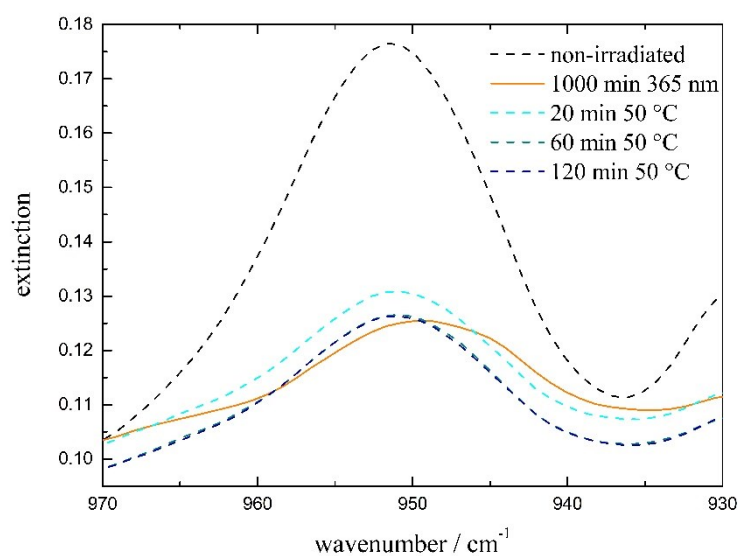

**Figure S8.** Heat treatment of SP-Nitro@MIL-68(In) at 50 °C for different times to induce the re-conversion to the initial state thermally.

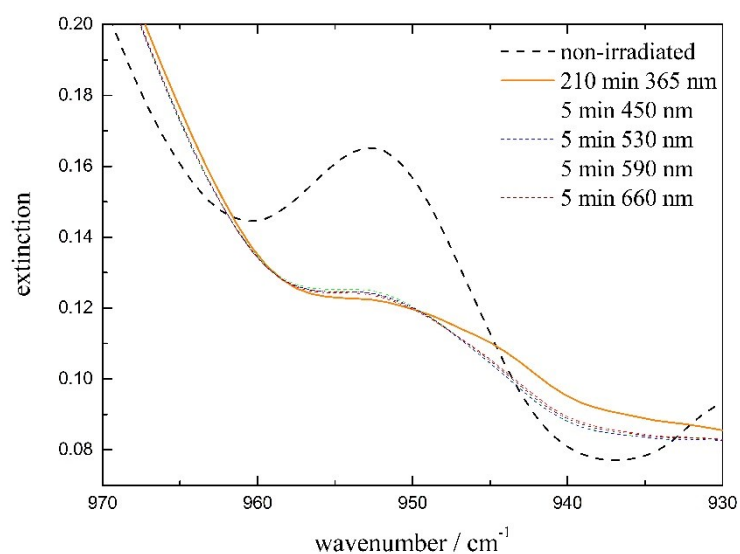

**Figure S9.** Light excitation of SP-Nitro@MIL-68(Ga) with different wavelengths to induce re-conversion to the ground state.

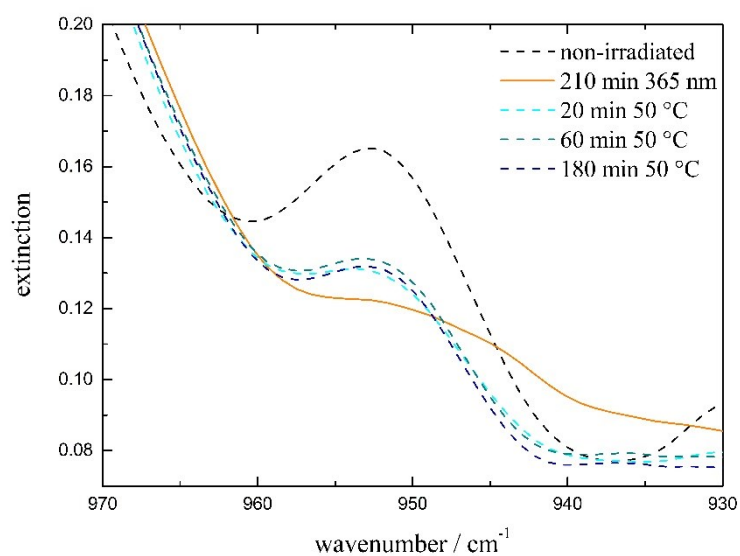

**Figure S10.** Heat treatment of SP-Nitro@MIL-68(Ga) at 50 °C for different times to induce the re-conversion to the initial state thermally.

**Table S1.** Observed decreasing IR bands of SP-Nitro@MIL-68(In). The given assignment is based on the experimental and calculated (“\*”) data of *Nakata* and co-workers<sup>[50]</sup>. Modes of vibration were attributed according to *Lyubimov* and co-workers<sup>[53]</sup>, *Paal* and *Arnold*<sup>[54]</sup> and *Hesse, Meyer & Zeeh*<sup>[55]</sup>.

| decreasing bands / cm <sup>-1</sup> | assignment / cm <sup>-1</sup> | vibration mode                                                                                                                                                                                                    |
|-------------------------------------|-------------------------------|-------------------------------------------------------------------------------------------------------------------------------------------------------------------------------------------------------------------|
| 1652                                | SP(1654)                      | $\nu(\text{C}=\text{C})$ , $\nu(\text{C}=\text{N})$ <sup>[3]</sup>                                                                                                                                                |
| 1612                                | SP(1615)                      | $\nu(\text{C}=\text{C})$ , $\nu(\text{C}=\text{N})$ <sup>[3]</sup>                                                                                                                                                |
| 1517                                | SP(1508)                      | ring-valence vibration $\nu(\text{C}=\text{C})$ <sup>[3]</sup>                                                                                                                                                    |
| <b>1479</b>                         | <b>SP(1482/1472)</b>          | ring-valence vibration $\nu(\text{C}=\text{C})$ <sup>[3]</sup>                                                                                                                                                    |
| <b>1332</b>                         | <b>SP(1334)*</b>              | <u>theoretical</u> <sup>[2]</sup> :<br>$\nu(\text{C}-\text{C})$ (rings I'-II')<br>$\nu(\text{C}-\text{C}-\text{H})$ (ring I)                                                                                      |
| <b>1272</b>                         | <b>SP(1275)</b>               | <u>theoretical</u> <sup>[2]</sup> :<br>$\nu(\text{C}-\text{O})$<br>$\nu(\text{C}-\text{C}-\text{H})$ (ring II)<br>$\nu(\text{N}-\text{C}_{\text{Methyl}})$ (ring I)<br>$\nu(\text{C}-\text{C}-\text{N})$ (ring I) |
| 1090                                | SP(1101)                      | $\delta(\text{C}-\text{H})_{\text{arom.}}$ <sup>[3]</sup>                                                                                                                                                         |
| 1023                                | SP(1025)                      | <u>theoretical</u> <sup>[2]</sup> :<br>$\nu(\text{O}-\text{C}_{\text{Spiro}}-\text{C})$ (ring I')<br>$\nu(\text{C}_{\text{Spiro}}-\text{O})$<br>$\nu(\text{N}-\text{C}-\text{C})$ (ring I')                       |
| 1013                                | SP(1013)                      | <u>theoretical</u> <sup>[2]</sup> :<br>$\nu(\text{C}-\text{C})$ (ring II)<br>$\nu(\text{C}-\text{N})$ (ring I)                                                                                                    |
| 952                                 | SP(959)                       | $\nu(\text{O}-\text{C}_{\text{Spiro}}-\text{N})$ <sup>[3]</sup>                                                                                                                                                   |
| 929                                 | SP(929)                       | <u>theoretical</u> <sup>[2]</sup> :<br>$\nu(\text{C}-\text{C}_{\text{Methyl}}-\text{H})$                                                                                                                          |

|     |         |                                                                                                                           |
|-----|---------|---------------------------------------------------------------------------------------------------------------------------|
| 806 | SP(810) | <u>theoretical</u> <sup>[2]</sup> :<br>deviation of H atoms from the plane (ring II)<br>out-of-plane vibrations (ring II) |
| 741 | SP(743) | $\gamma$ (C–H) benzene ring <sup>[3]</sup>                                                                                |
| 681 | SP(685) | <u>theoretical</u> <sup>[2]</sup> :<br>out-of-plane vibrations (rings I', II')                                            |



**Table S2.** Observed increasing IR bands of SP-Nitro@MIL-68(In). The indicated assignment is based on the experimental and calculated (“\*”) data of *Nakata* and co-workers<sup>[50]</sup>. Modes of vibration were attributed according to *Lyubimov* and co-workers<sup>[53]</sup>, *Paal* and *Arnold*<sup>[54]</sup> and *Hesse, Meyer & Zeeh*<sup>[55]</sup>.

| increasing bands / cm <sup>-1</sup> | assignment / cm <sup>-1</sup> | vibration mode                                                                                                                                                  |
|-------------------------------------|-------------------------------|-----------------------------------------------------------------------------------------------------------------------------------------------------------------|
| <b>1622</b>                         | <b>MC(1628)</b>               | $\nu(\text{C}=\text{C})$ , $\nu(\text{C}=\text{N})$ <sup>[3]</sup>                                                                                              |
| 1603/1592                           | MC(1595)*                     | <u>theoretical</u> <sup>[2]</sup><br>$\nu(\text{C}-\text{C})$ (ring II)<br>$\nu(\text{C}-\text{C})$ (ring II)                                                   |
| 1565                                | MC(1560)*                     | <u>theoretical</u> <sup>[2]</sup><br>$\nu(\text{C}-\text{C})$ (ring II')<br>$\nu(\text{C}=\text{N})$ (ring I')                                                  |
| 1532                                | MC(1600-1500)                 | ring-valence vibration $\nu(\text{C}=\text{C})$ <sup>[3,4]</sup>                                                                                                |
| <b>1498</b>                         | <b>MC(1490)*</b>              | ring-valence vibration $\nu(\text{C}=\text{C})$ <sup>[3,4]</sup>                                                                                                |
| 1458                                | MC(1459)                      | <u>theoretical</u> <sup>[2]</sup><br>$\nu(\text{C}-\text{C})$ (ring II)<br>$\nu(\text{C}-\text{N})$ (ring I)<br>$\nu(\text{C}-\text{C}-\text{H})$ (ring II)     |
| 1438                                | MC(1430)*                     | <u>theoretical</u> <sup>[2]</sup><br>$\nu(\text{H}-\text{C}_{\text{Methyl}}-\text{H})$ on N atom<br>$\nu(\text{H}-\text{C}_{\text{Methyl}}-\text{H})$ on C atom |
| 1412                                | MC(1407)*                     | $\delta(\text{C}-\text{H})$ neighboring $\text{C}=\text{O}$ <sup>[4]</sup>                                                                                      |
| 1387                                | MC(1388)                      | $\delta(\text{C}-\text{H})$ methyl-group of ring I <sup>[4]</sup>                                                                                               |
| 1369                                | MC(1365)                      | $\delta(\text{C}-\text{H})$ methyl-group of ring I <sup>[4]</sup>                                                                                               |
| <b>1308</b>                         | <b>MC(1314)*</b>              | $\delta(\text{C}-\text{H})$ methyl-group of ring I <sup>[4]</sup>                                                                                               |
| 1286                                | MC(1281)                      | <u>theoretical</u> <sup>[2]</sup><br>$\nu(\text{C}-\text{O})$<br>$\nu(\text{N}-\text{C}_{\text{Methyl}})$ (ring I)                                              |

|      |           |                                                                                                                                                                                                    |
|------|-----------|----------------------------------------------------------------------------------------------------------------------------------------------------------------------------------------------------|
|      |           | $\nu(\text{C}-\text{C}-\text{N})$ (ring I)<br>$\nu(\text{C}-\text{C}-\text{H})$ (ring II)                                                                                                          |
| 1255 | MC(1252)* | <u>theoretical</u> <sup>[2]</sup><br>$\nu(\text{C}-\text{C})$ (ring I)<br>$\nu(\text{C}-\text{C}-\text{C}_{\text{Methyl}})$<br>$\nu(\text{C}-\text{C}_{\text{Methyl}}-\text{H})$                   |
| 1212 | MC(1210)* | <u>theoretical</u> <sup>[2]</sup><br>$\nu(\text{C}-\text{C})$ (ring II')                                                                                                                           |
| 1157 | MC(1159)* | <u>theoretical</u> <sup>[2]</sup><br>$\nu(\text{C}-\text{C})$ (ring I)<br>$\nu(\text{C}-\text{C}_{\text{Methyl}}-\text{H})$ (ring I)<br>$\nu(\text{C}-\text{C}-\text{C}_{\text{Methyl}})$ (ring I) |
| 1134 | MC(1126)  | <u>theoretical</u> <sup>[2]</sup><br>$\nu(\text{C}-\text{C})$ (ring II')<br>$\nu(\text{C}-\text{C}-\text{H})$ (ring II')                                                                           |
| 1115 | MC(1119)* | $\delta(\text{C}-\text{H})_{\text{arom.}}$ <sup>[3]</sup>                                                                                                                                          |
| 1080 | MC(1086)* | <u>theoretical</u> <sup>[2]</sup><br>$\nu(\text{C}-\text{O})$                                                                                                                                      |
| 1043 | MC(1048)  | <u>theoretical</u> <sup>[2]</sup><br>$\delta(\text{ring II})$<br>$\nu(\text{N}-\text{C}_{\text{Methyl}})$                                                                                          |
| 1018 | MC(1220)  | <u>theoretical</u> <sup>[2]</sup><br>$\nu(\text{C}-\text{C})$ (ring II)<br>$\nu(\text{C}-\text{N})$ (ring I)                                                                                       |
| 1007 | MC(1005)* | <u>theoretical</u> <sup>[2]</sup><br>$\nu(\text{C}-\text{C})$ (ring II)<br>$\nu(\text{C}-\text{N})$ (ring I)                                                                                       |
| 981  | MC(945)   | <u>theoretical</u> <sup>[2]</sup>                                                                                                                                                                  |

|     |                    |                                                                                                                                               |
|-----|--------------------|-----------------------------------------------------------------------------------------------------------------------------------------------|
|     | MC(988)            | $\delta(\text{C}_{\text{Methyl}}\text{--H})$<br>$\nu(\text{C--N})$ (ring I)                                                                   |
| 938 | MC(933)            | <u>theoretical</u> <sup>[2]</sup><br>$\nu(\text{C--C}_{\text{Methyl}}\text{--H})$                                                             |
| 866 | MC(865)<br>MC(868) | <u>theoretical</u> <sup>[2]</sup><br>$\nu(\text{C--N})$ (ring I)<br>$\nu(\text{C--C}_{\text{Methyl}}\text{--H})$<br>$\delta(\text{ring II'})$ |
| 717 | MC(719)            | <u>theoretical</u> <sup>[2]</sup><br>deviation of H atoms from the<br>plane (ring II)                                                         |
| 623 | MC(625)            | $\delta(\text{ring II})$<br>out-of-plane vibrations (ring II')                                                                                |

**Table S3.** Observed decreasing IR bands of SP-Nitro@MIL-68(Ga). The given assignment is based on the experimental and calculated (“\*”) data of *Nakata* and co-workers<sup>[50]</sup>. Modes of vibration were attributed according to *Lyubimov* and co-workers<sup>[53]</sup>, *Paal* and *Arnold*<sup>[54]</sup> and *Hesse, Meyer & Zeeh*<sup>[55]</sup>.

| decreasing bands / cm <sup>-1</sup> | assignment / cm <sup>-1</sup> | vibration mode                                                                                                                                                                                                    |
|-------------------------------------|-------------------------------|-------------------------------------------------------------------------------------------------------------------------------------------------------------------------------------------------------------------|
| 1650                                | SP(1654)                      | $\nu(\text{C}=\text{C})$ , $\nu(\text{C}=\text{N})$ <sup>[3]</sup>                                                                                                                                                |
| 1580                                | SP(1583)                      | ring-valence vibration $\nu(\text{C}=\text{C})$ <sup>[3]</sup>                                                                                                                                                    |
| <b>1478</b>                         | <b>SP(1482/1472)</b>          | ring-valence vibration $\nu(\text{C}=\text{C})$ <sup>[3]</sup>                                                                                                                                                    |
| <b>1334</b>                         | <b>SP(1334)*</b>              | <u>theoretical</u> <sup>[2]</sup> :<br>$\nu(\text{C}-\text{C})$ (rings I'-II')<br>$\nu(\text{C}-\text{C}-\text{H})$ (ring I)                                                                                      |
| <b>1274</b>                         | <b>SP(1275)</b>               | <u>theoretical</u> <sup>[2]</sup> :<br>$\nu(\text{C}-\text{O})$<br>$\nu(\text{C}-\text{C}-\text{H})$ (ring II)<br>$\nu(\text{N}-\text{C}_{\text{Methyl}})$ (ring I)<br>$\nu(\text{C}-\text{C}-\text{N})$ (ring I) |
| 1224                                | SP(1221)                      | <u>theoretical</u> <sup>[2]</sup> :<br>$\nu(\text{C}-\text{C})$ (ring II')                                                                                                                                        |
| 952                                 | SP(959)                       | $\nu(\text{O}-\text{C}_{\text{Spiro}}-\text{N})$ <sup>[3]</sup>                                                                                                                                                   |
| 929                                 | SP(929)                       | <u>theoretical</u> <sup>[2]</sup> :<br>$\nu(\text{C}-\text{C}_{\text{Methyl}}-\text{H})$                                                                                                                          |
| 917                                 | SP(912)                       | <u>theoretical</u> <sup>[2]</sup> :<br>deviation of H atoms from the plane (ring II')                                                                                                                             |

|     |         |                                                                                                                                                                                                                                              |
|-----|---------|----------------------------------------------------------------------------------------------------------------------------------------------------------------------------------------------------------------------------------------------|
| 904 | SP(903) | <u>theoretical</u> <sup>[2]</sup> :<br>deviation of H atoms from the plane (ring II)<br>deviation of H atoms from the plane (ring II')<br>deviation of H atoms from the plane (ring I')<br>$\nu(\text{C}-\text{C}_{\text{Methyl}})$ (ring I) |
| 807 | SP(810) | <u>theoretical</u> <sup>[2]</sup> :<br>deviation of H atoms from the plane (ring II)<br>out-of-plane vibrations (ring II)                                                                                                                    |
| 743 | SP(743) | $\gamma(\text{C}-\text{H})$ benzene ring <sup>[3]</sup>                                                                                                                                                                                      |
| 681 | SP(685) | <u>theoretical</u> <sup>[2]</sup> :<br>out-of-plane vibrations (rings I', II')                                                                                                                                                               |

**Table S4.** Observed increasing IR bands of SP-Nitro@MIL-68(Ga). The indicated assignment is based on the experimental and calculated (“\*”) data of *Nakata* and co-workers<sup>[50]</sup>. Modes of vibration were attributed according to *Lyubimov* and co-workers<sup>[53]</sup>, *Paal* and *Arnold*<sup>[54]</sup> and *Hesse, Meyer & Zeeh*<sup>[55]</sup>.

| increasing bands / cm <sup>-1</sup> | assignment / cm <sup>-1</sup> | vibration mode                                                                                                                                                                                                |
|-------------------------------------|-------------------------------|---------------------------------------------------------------------------------------------------------------------------------------------------------------------------------------------------------------|
| <b>1620</b>                         | <b>MC(1628)</b>               | $\nu(\text{C}=\text{C})$ , $\nu(\text{C}=\text{N})$ <sup>[3]</sup>                                                                                                                                            |
| 1603/1593                           | MC(1595)*                     | <u>theoretical</u> <sup>[2]</sup><br>$\nu(\text{C}-\text{C})$ (ring II)<br>$\nu(\text{C}-\text{C})$ (ring II)                                                                                                 |
| 1573                                | MC(1587)<br>MC(1591)          | <u>theoretical</u> <sup>[2]</sup><br>$\nu(\text{C}-\text{C})$ (ring II’)<br>$\nu(\text{C}-\text{C})$ (ring II)<br>$\nu(\text{C}-\text{C}-\text{H})$ (ring II)<br>$\nu(\text{C}-\text{C}-\text{H})$ (ring II’) |
| 1531                                | MC(1600-1500)                 | ring-valence vibration $\nu(\text{C}=\text{C})$ <sup>[3,4]</sup>                                                                                                                                              |
| <b>1504</b>                         | <b>MC(1490)*</b>              | ring-valence vibration $\nu(\text{C}=\text{C})$ <sup>[3,4]</sup>                                                                                                                                              |
| 1459                                | MC(1459)                      | <u>theoretical</u> <sup>[2]</sup><br>$\nu(\text{C}-\text{C})$ (ring II)<br>$\nu(\text{C}-\text{N})$ (ring I)<br>$\nu(\text{C}-\text{C}-\text{H})$ (ring II)                                                   |
| 1438                                | MC(1430)*                     | <u>theoretical</u> <sup>[2]</sup><br>$\nu(\text{H}-\text{C}_{\text{Methyl}}-\text{H})$ on N atom<br>$\nu(\text{H}-\text{C}_{\text{Methyl}}-\text{H})$ on C atom                                               |
| 1415                                | MC(1407)*                     | $\delta(\text{C}-\text{H})$ neighboring $\text{C}=\text{O}$ <sup>[4]</sup>                                                                                                                                    |
| 1396                                | MC(1399)                      | $\delta(\text{C}-\text{H})$ methyl-group of ring I <sup>[4]</sup>                                                                                                                                             |
| 1368                                | MC(1365)*                     | $\delta(\text{C}-\text{H})$ methyl-group of ring I <sup>[4]</sup>                                                                                                                                             |
| <b>1309</b>                         | <b>MC(1314)*</b>              | $\delta(\text{C}-\text{H})$ methyl-group of ring I <sup>[4]</sup>                                                                                                                                             |

|      |           |                                                                                                                                                                        |
|------|-----------|------------------------------------------------------------------------------------------------------------------------------------------------------------------------|
| 1287 | MC(1281)  | <u>theoretical</u> <sup>[2]</sup><br>$\nu(\text{C-O})$<br>$\nu(\text{N-C}_{\text{Methyl}})$ (ring I)<br>$\nu(\text{C-C-N})$ (ring I)<br>$\nu(\text{C-C-H})$ (ring II)  |
| 1256 | MC(1252)* | <u>theoretical</u> <sup>[2]</sup><br>$\nu(\text{C-C})$ (ring I)<br>$\nu(\text{C-C-C}_{\text{Methyl}})$<br>$\nu(\text{C-C}_{\text{Methyl}}\text{-H})$                   |
| 1213 | MC(1210)* | <u>theoretical</u> <sup>[2]</sup><br>$\nu(\text{C-C})$ (ring II')                                                                                                      |
| 1158 | MC(1159)* | <u>theoretical</u> <sup>[2]</sup><br>$\nu(\text{C-C})$ (ring I)<br>$\nu(\text{C-C}_{\text{Methyl}}\text{-H})$ (ring I)<br>$\nu(\text{C-C-C}_{\text{Methyl}})$ (ring I) |
| 1133 | MC(1126)  | <u>theoretical</u> <sup>[2]</sup><br>$\nu(\text{C-C})$ (ring II')<br>$\nu(\text{C-C-H})$ (ring II')                                                                    |
| 1116 | MC(1119)* | $\delta(\text{C-H})_{\text{arom.}}$ <sup>[3]</sup>                                                                                                                     |
| 1082 | MC(1086)* | <u>theoretical</u> <sup>[2]</sup><br>$\nu(\text{C-O})$                                                                                                                 |
| 1042 | MC(1048)  | <u>theoretical</u> <sup>[2]</sup><br>$\delta(\text{ring II})$<br>$\nu(\text{N-C}_{\text{Methyl}})$                                                                     |
| 970  | MC(965)*  | <u>theoretical</u> <sup>[2]</sup><br>$\delta(\text{C}_{\text{Methyl}}\text{-H})$<br>$\nu(\text{C-N})$ (ring I)                                                         |
| 940  | MC(943)   | <u>theoretical</u> <sup>[2]</sup>                                                                                                                                      |

|     |          |                                                                                                                                               |
|-----|----------|-----------------------------------------------------------------------------------------------------------------------------------------------|
|     |          | $\nu(\text{C}-\text{C}_{\text{Methyl}}-\text{H})$                                                                                             |
| 890 | MC(898)* | <u>theoretical</u> <sup>[2]</sup><br>deviation of H atoms from the plane (rings II, II')<br>$\nu(\text{C}-\text{C}_{\text{Methyl}})$ (ring I) |
| 872 | MC(878)* | <u>theoretical</u> <sup>[2]</sup><br>$\nu(\text{C}-\text{N})$ (ring I)<br>$\delta(\text{ring II}')$                                           |
| 859 | MC(853)  | <u>theoretical</u> <sup>[2]</sup><br>$\delta(\text{ring I})$                                                                                  |
| 838 | MC(831)  | <u>theoretical</u> <sup>[2]</sup><br>out-of-plane vibrations (II')                                                                            |
| 717 | MC(719)  | <u>theoretical</u> <sup>[2]</sup><br>deviation of H atoms from the plane (ring II)                                                            |
| 620 | MC(617)  | <u>theoretical</u> <sup>[2]</sup><br>$\delta(\text{ring II})$<br>out-of-plane vibrations (ring II')                                           |

## References

- [1] Y. Futami, M. L. S. Chin, S. Kudoh, M. Takayanagi, M. Nakata, *Chem. Phys. Lett.* **2003**, 370, 460–468.
- [2] L. L. Gladkov, Y. D. Khamchukov, I. Y. Sychev, A. V. Lyubimov, *J. Appl. Spectrosc.* **2012**, 79, 31–37.
- [3] G. Arnold, G. Paal, *Tetrahedron* **1971**, 27, 1699–1713.
- [4] M. Hesse, H. Meyer, B. Zeeh, *Spektroskopische Methoden in der Organischen Chemie*, Georg Thieme Verlag, Stuttgart, **2002**.
